# Supplementary material
Source: publisher site journal article supplement (https://www.dovepress.com/article/529521)
Supplement: Supplementary file 1 [file 529521%20Revised%20Supplementary%20Tables%201-4.docx]

**Supplementary Table 1. Information of included studies and consortia**

| **PHENOTYPES** | **Consortium** | **Year** | **Sample Size** | **N Cases** | **N Controls** | **Population** | **MRC-IEU ID** |
| --- | --- | --- | --- | --- | --- | --- | --- |
| Major depression | PGC | 2019 | 500,199 | 170,756 | 329,443 | European | ieu-b-102 |
| Sleep disorders | FinnGen | 2021 | 216,700 | 19,155 | 197,545 | European | finn-b-SLEEP |
| Constipation | FinnGen | 2021 | 218,792 | 17,246 | 201,546 | European | finn-b-K11_CONSTIPATION |

**Supplementary Table 2. Single nucleotide polymorphisms used as instrumental variables for Depression**

| **SNP** | **Effect_allele.exposure** | **Other_allele.exposure** | **Beta. exposure** | **Eaf. exposure** | **Chr. exposure** | **Pos. exposure** | **Se. exposure** | **Pval. exposure** | **F** |
| --- | --- | --- | --- | --- | --- | --- | --- | --- | --- |
| rs1021363 | G | A | -0.03 | 0.6434 | 10 | 106610839 | 0.0045 | 2.28718e-11 | 44.4 |
| rs10235664 | C | T | -0.027 | 0.2529 | 7 | 2086814 | 0.0049 | 4.67703e-08 | 30.4 |
| rs10913112 | T | C | -0.0262 | 0.378 | 1 | 175913828 | 0.0045 | 4.52501e-09 | 33.9 |
| rs12919291 | C | G | 0.0327 | 0.1884 | 16 | 13800430 | 0.0055 | 3.092e-09 | 35.3 |
| rs12967143 | C | G | -0.0345 | 0.7012 | 18 | 53099012 | 0.0047 | 2.52697e-13 | 53.9 |
| rs13037326 | T | C | 0.031 | 0.2597 | 20 | 44692598 | 0.0049 | 2.398e-10 | 40.0 |
| rs1367635 | C | T | 0.0253 | 0.5148 | 18 | 50861409 | 0.0043 | 4.35402e-09 | 34.6 |
| rs150186873 | C | A | 0.0704 | 0.0327 | 6 | 27182377 | 0.012 | 4.51305e-09 | 34.4 |
| rs150346963 | T | C | 0.0283 | 0.4118 | 7 | 117625599 | 0.0044 | 1.15699e-10 | 41.4 |
| rs17641524 | T | C | -0.03 | 0.2101 | 1 | 197704717 | 0.0053 | 1.502e-08 | 32.0 |
| rs1931388 | G | A | -0.0295 | 0.4042 | 9 | 11203149 | 0.0044 | 1.67996e-11 | 45.0 |
| rs1950829 | G | A | -0.0297 | 0.5173 | 14 | 42097937 | 0.0043 | 4.73805e-12 | 47.7 |
| rs198457 | T | C | -0.0315 | 0.1886 | 11 | 61471678 | 0.0056 | 1.89998e-08 | 31.6 |
| rs2111592 | A | G | 0.0263 | 0.3141 | 2 | 208049581 | 0.0046 | 1.34999e-08 | 32.7 |
| rs2214123 | G | A | -0.0261 | 0.6466 | 6 | 67000001 | 0.0045 | 8.55598e-09 | 33.6 |
| rs2232423 | G | A | -0.062 | 0.1056 | 6 | 28366151 | 0.007 | 1.13501e-18 | 78.4 |
| rs2418449 | C | T | -0.0281 | 0.281 | 9 | 119731359 | 0.0048 | 4.24502e-09 | 34.3 |
| rs247910 | G | A | 0.0237 | 0.457 | 5 | 87630769 | 0.0043 | 4.71205e-08 | 30.4 |
| rs2522831 | C | T | 0.024 | 0.4739 | 7 | 82448100 | 0.0043 | 2.113e-08 | 31.2 |
| rs2568958 | A | G | 0.0382 | 0.6042 | 1 | 72765116 | 0.0044 | 2.90202e-18 | 75.4 |
| rs28541419 | G | C | -0.0292 | 0.2308 | 15 | 88945878 | 0.0052 | 1.75598e-08 | 31.5 |
| rs2876520 | G | C | 0.026 | 0.4688 | 6 | 142996618 | 0.0043 | 2.24099e-09 | 36.6 |
| rs30266 | A | G | 0.0366 | 0.3271 | 5 | 103972357 | 0.0046 | 1.42791e-15 | 63.3 |
| rs354155 | C | G | -0.0449 | 0.0923 | 1 | 49675276 | 0.0075 | 1.75102e-09 | 35.8 |
| rs3807865 | A | G | 0.031 | 0.4105 | 7 | 12250402 | 0.0044 | 1.09295e-12 | 49.6 |
| rs4141983 | C | T | -0.0264 | 0.326 | 1 | 18122009 | 0.0046 | 9.69192e-09 | 32.9 |
| rs4497414 | C | T | 0.0291 | 0.44 | 11 | 88756779 | 0.0044 | 2.92685e-11 | 43.7 |
| rs4730387 | A | T | 0.0238 | 0.4659 | 7 | 109100414 | 0.0043 | 4.12003e-08 | 30.6 |
| rs4799949 | T | C | -0.0292 | 0.6684 | 18 | 35155910 | 0.0046 | 1.40301e-10 | 40.3 |
| rs4936276 | C | G | 0.0278 | 0.622 | 11 | 113365141 | 0.0044 | 3.57001e-10 | 39.9 |
| rs508502 | T | C | -0.0264 | 0.2992 | 13 | 80921519 | 0.0048 | 3.55599e-08 | 30.3 |
| rs59082935 | T | C | 0.0363 | 0.1342 | 7 | 38724868 | 0.0066 | 3.071e-08 | 30.3 |
| rs59283172 | A | G | -0.039 | 0.1081 | 9 | 25232978 | 0.007 | 2.40902e-08 | 31.0 |
| rs61914045 | A | G | 0.0309 | 0.2034 | 12 | 52352301 | 0.0054 | 7.96398e-09 | 32.7 |
| rs62535714 | A | G | 0.0339 | 0.1639 | 9 | 37182655 | 0.0058 | 4.68598e-09 | 34.2 |
| rs66511648 | C | T | 0.0297 | 0.284 | 3 | 117515519 | 0.0048 | 6.03004e-10 | 38.3 |
| rs7152906 | C | T | 0.0258 | 0.5196 | 14 | 75125540 | 0.0043 | 1.87301e-09 | 36.0 |
| rs7241572 | A | G | 0.0323 | 0.2047 | 18 | 77580712 | 0.0054 | 2.43299e-09 | 35.8 |
| rs72948506 | A | G | 0.0265 | 0.2975 | 2 | 212618440 | 0.0047 | 1.71498e-08 | 31.8 |
| rs7538938 | C | T | 0.0251 | 0.5599 | 1 | 67132262 | 0.0043 | 7.28903e-09 | 34.1 |
| rs754287 | A | T | -0.0289 | 0.3664 | 14 | 103997525 | 0.0045 | 1.31099e-10 | 41.2 |
| rs7551758 | G | T | 0.0283 | 0.5329 | 1 | 52274078 | 0.0043 | 5.1074e-11 | 43.3 |
| rs76954012 | A | T | 0.0412 | 0.0931 | 3 | 115977242 | 0.0074 | 2.41002e-08 | 31.0 |
| rs7725715 | A | G | 0.029 | 0.5343 | 5 | 164487555 | 0.0043 | 1.60694e-11 | 45.5 |
| rs843812 | A | G | 0.0248 | 0.4117 | 3 | 61255413 | 0.0044 | 1.40501e-08 | 31.8 |
| rs9364755 | G | A | 0.0283 | 0.2262 | 6 | 165117329 | 0.0051 | 3.48602e-08 | 30.8 |
| rs9529218 | T | C | -0.034 | 0.2031 | 13 | 31790053 | 0.0054 | 2.231e-10 | 39.6 |
| rs9536381 | T | C | 0.0255 | 0.3259 | 13 | 53860655 | 0.0046 | 2.61698e-08 | 30.7 |
| rs9831648 | T | G | -0.0292 | 0.7739 | 3 | 49214303 | 0.0052 | 1.58599e-08 | 31.5 |

**Supplementary Table 3. Detailed data for univariate mendelian randomization**

| **outcome** | **exposure** | **method** | **nsnp** | **b** | **se** | **pval** | **OR_95_CI** | **egger_intercept** | **se** | **pval** | **method** | **Q** | **Q_pval** |
| --- | --- | --- | --- | --- | --- | --- | --- | --- | --- | --- | --- | --- | --- |
| Constipation || id:finn-b-K11_CONSTIPATION | Major depression || id:ieu-b-102 | Inverse variance weighted | 47 | 0.234633 | 0.065614 | 0.000349 | 1.26(1.11-1.44) | 0.005035 | 0.011623 | 0.66697 | Inverse variance weighted | 44.3635 | 0.540979 |
| Constipation || id:finn-b-K11_CONSTIPATION | Major depression || id:ieu-b-102 | Weighted median | 47 | 0.182802 | 0.101609 | 0.072009 | 1.2(0.98-1.47) | 0.005035 | 0.011623 | 0.66697 | Inverse variance weighted | 44.3635 | 0.540979 |
| Constipation || id:finn-b-K11_CONSTIPATION | Major depression || id:ieu-b-102 | MR Egger | 47 | 0.069093 | 0.387762 | 0.859378 | 1.07(0.5-2.29) | 0.005035 | 0.011623 | 0.66697 | Inverse variance weighted | 44.3635 | 0.540979 |
| Sleep disorders (combined) || id:finn-b-SLEEP | Major depression || id:ieu-b-102 | Inverse variance weighted | 47 | 0.24501 | 0.078807 | 0.003516 | 1.26(1.08-1.47) | 0.009458 | 0.014046 | 0.504158 | Inverse variance weighted | 68.71943 | 0.016587 |
| Sleep disorders (combined) || id:finn-b-SLEEP | Major depression || id:ieu-b-102 | Weighted median | 47 | 0.175033 | 0.095245 | 0.066105 | 1.19(0.99-1.44) | 0.009458 | 0.014046 | 0.504158 | Inverse variance weighted | 68.71943 | 0.016587 |
| Sleep disorders (combined) || id:finn-b-SLEEP | Major depression || id:ieu-b-102 | MR Egger | 47 | -0.08097 | 0.468581 | 0.863588 | 0.92(0.37-2.31) | 0.009458 | 0.014046 | 0.504158 | Inverse variance weighted | 68.71943 | 0.016587 |
| Constipation || id:finn-b-K11_CONSTIPATION | Sleep disorders (combined) || id:finn-b-SLEEP | Inverse variance weighted | 3 | 0.181622 | 0.085468 | 0.033585 | 1.2(1.01-1.42) | NA | NA | NA | NA | NA | NA |

**Supplementary Table 4. Detailed data for multivariate mendelian randomization**

| id.exposure | exposure | id.outcome | outcome | nsnp | b | se | pval | lo_ci | up_ci | or | or_lci95 | or_uci95 |
| --- | --- | --- | --- | --- | --- | --- | --- | --- | --- | --- | --- | --- |
| finn-b-SLEEP | Sleep disorders (combined) || id:finn-b-SLEEP | finn-b-K11_CONSTIPATION | Constipation || id:finn-b-K11_CONSTIPATION | 3 | 0.122105 | 0.070054 | 0.081332 | -0.0152 | 0.259412 | 1.129873 | 0.984914 | 1.296167 |
| ieu-b-102 | Major depression || id:ieu-b-102 | finn-b-K11_CONSTIPATION | Constipation || id:finn-b-K11_CONSTIPATION | 47 | 0.205335 | 0.067375 | 0.002089 | 0.07528 | 0.339391 | 1.230395 | 1.078186 | 1.404092 |
